# Supplementary material
Source: MDPI journal article supplement (https://www.mdpi.com/2071-1050/12/10/3999)
Supplement: s1 [file s1]

## Supplementary Materials

|      |                                                                                         |    |
|------|-----------------------------------------------------------------------------------------|----|
| 1.   | Background information on the interviews .....                                          | 1  |
| 2.   | Questionnaires shared with EU Member States, Commission Services and Stakeholders ..... | 3  |
| 2.1. | Example of an EU Member State questionnaire.....                                        | 3  |
| 2.2. | Commission Services questionnaire .....                                                 | 11 |
| 2.4. | Stakeholder questionnaire.....                                                          | 17 |

### 1. Background information on the interviews

Interviews with individuals from the Commission Services, Member States representatives and stakeholders focused on individuals that had been involved or had experience with the implementation and outputs of the EU Forest Action Plan.

The answers from the questionnaire were circulated to the interviewees in advance. They were requested to examine the answers provided and make any notes in the questionnaire before the interview. These preparations were meant to help the interviewer get the correct information during the interview.

The questionnaires (see Section2) were structured according to the Evaluation Questions (EQ) as defined in the EU FAP ex-post evaluation. It contains detailed questions on the Key Actions and activities, as well as, more general questions on the implementation and results of the Action Plan.

The questions were divided according to five different evaluation questions that correspond to the answers provided in the questionnaire:

- **Evaluation Question 1.** To what extent have the activities in the framework of the EU FAP been effective and efficient?
- **Evaluation Question 2.** To what extent have the activities in the framework of the Action Plan contributed to the improvement of coherence and cross-sectoral co-operation in implementing the EU Forestry Strategy?
- **Evaluation Question 3.** To what extent have the activities in the framework of the Action Plan contributed to balance economic, environmental and socio-cultural objectives related to forestry?
- **Evaluation Question 4.** To what extent had the Action Plan an added value in implementing the EU Forestry Strategy?
- **Evaluation Question 5.** Are the current objectives, key actions and activities of the Action Plan still relevant in tackling the needs the Plan was intended to address? To what extent is the organisational set-up of the Action Plan as a whole adequate for its purpose?

The interviewees had accordingly been approached with questions on the implementation of the activities (at EU, Member States and Stakeholder level), about the effectiveness and efficiency, added value and the relevance of the Action Plan, prior to the interview itself. This information was needed to prepare follow-up questions for the structured interviews in order to cover the required level of detail. The interviewees were asked to provide additional detailed information relating to the answers provided in the questionnaire and any information needs that were not included in the questionnaire (or identified during the process of data collection).

All interview questions related to the above-stated generic evaluation questions. Below are some examples for each evaluation question as regards the types of questions that were elaborated during the interviews.

EQ1 relates to implementation in term of the **effectiveness** and **efficiency** of activities of the Action Plan. Questions that may require further investigation during the interview(s) is:

*“... relevance of activities directly triggered by the Action Plan?”*  
*“... relevance of parallel actions that have contributed to achievement of the EU FAP?”*

EQ2 relates to impact in term of the **coherence** and **cross-sectoral co-operation** in implementing the EU Forestry Strategy. Questions that may require further investigation during the interview(s) is:

*“... impact of the EU FAP on forest-related EU policies?”*  
*“... impact of the EU FAP on national forest policy or other forest-related policies?”*

EQ3 relates to the **balance between economic, environmental and socio-cultural objectives** related to forestry. Questions that may require further investigation during the interview(s) is:

*“... elaborating on where synergies have been identified to define its effect between Community actions and the forest policies of the Member States, as well as, between different Community actions?”*

EQ4 relates to the **added value of the Action Plan** in implementing the EU Forestry Strategy. Questions that may require further investigation during the interview(s) is:

*“... elaborating on whether the reported activities of the Action Plan can be considered to have truly added value to the implementation of the EU Forestry Strategy, e.g. in terms of improving the visibility of the sector and facilitating coherence and coordination of activities between different Community actions?”*

EQ5 relates **relevance of the Action Plans** objectives, key actions and activities. It also relates to the organisational set-up of the Action Plan. Questions that may require further investigation during the interview(s) is:

*“... relevance of the organizational set-up for implementation of the Action Plan?”*  
*“... emerging policy issues, societal needs and future challenges facing the forest sector?”*  
*“... shortcomings in implementation of the Action Plan?”*

The targeted questions provided above are simply given as examples for the types of questions that the interviewers focused on during the interview. The exact questions were tailored, as noted earlier, based on the answers provided to the questionnaires and therefore varied somewhat in-between the interviewees. This approach allowed for more flexibility as well as an opportunity to address any data gaps.

## 2. Questionnaires shared with EU Member States, Commission Services and Stakeholders

### 2.1. Example of an EU Member State questionnaire

Each questionnaire was built upon the reporting provided for the mid-term evaluation of the Action Plan. Questions related to activities on the national level were therefore tailored for each country and would vary somewhat between countries.

Please note that the guidance to the questionnaire has not been included in the below version of the questionnaire shared with EU Member States.

#### Background information

|                                                          |  |
|----------------------------------------------------------|--|
| 1. Country:                                              |  |
| 2. Contact person for the questionnaire:                 |  |
| 3. Position:                                             |  |
| 4. Organisation:                                         |  |
| 5. Address:                                              |  |
| 6. Tel. & e-mail:                                        |  |
| 7. Other respondents involved in compiling the response: |  |

## Effectiveness and efficiency of the EU Forest Action Plan

**1. The EU Forest Action Plan work programme 2007-2011 indicates Member States as Actors – on their own or together with the Commission – in a number of activities in the total of 18 FAP Key Actions. The below table summarises the activities reported by your country in the mid-term evaluation of the EU Forest Action Plan in 2009. The EU FAP mid-term evaluation report can be downloaded [here](#), and in case you want a copy of your country's response to the EU FAP mid-term evaluation survey (incl. details about the reported activities in 2009), please contact Mr Hubert Inhaizer**

**Please click the dropdown menu, and indicate the degree of implementation of the reported activities in your country.**

| KEY ACTION                                                                                                                                                                                                                                                                                                                           | ACTION                                                                                                                                                      | REPORTED    | CURRENT STATUS |
|--------------------------------------------------------------------------------------------------------------------------------------------------------------------------------------------------------------------------------------------------------------------------------------------------------------------------------------|-------------------------------------------------------------------------------------------------------------------------------------------------------------|-------------|----------------|
| <b>Objective 1: Improving long-term competitiveness</b>                                                                                                                                                                                                                                                                              |                                                                                                                                                             |             |                |
| Key action 1: Examine the effects of globalisation on the economic viability and competitiveness of EU forestry                                                                                                                                                                                                                      | 1.2 Raising awareness of factors affecting competitiveness of forestry in the EU                                                                            | N/A         |                |
| Key Action 2: Encourage research and technological development to enhance the competitiveness of the forest sector                                                                                                                                                                                                                   | 2.3 Implementation of the Forest-based sector Technology Platform (FTP) Strategic Research Agenda SRA / National Research Agenda NRA                        | IN PROGRESS |                |
| Key Action 3: Exchange and assess experiences on the valuation and marketing of non-wood forest goods and services                                                                                                                                                                                                                   | 3.1 Carry out studies and pilot projects on valuation, compensation and innovative marketing of non-wood forest goods and services, including methodologies | IN PROGRESS |                |
| Key action 4: Promote the use of forest biomass for energy generation                                                                                                                                                                                                                                                                | 4.1 Improve the mobilisation and efficient use of wood and wood residues, including low-value timber / e.g. National Biomass Action Plan                    | CARRIED OUT |                |
|                                                                                                                                                                                                                                                                                                                                      | 4.2 Developing cooperation methods and mechanisms between forest owners in energy markets                                                                   | IN PROGRESS |                |
|                                                                                                                                                                                                                                                                                                                                      | 4.4 Utilise EARDF resources in rural development programmes for promoting the use of forest biomass for energy generation                                   | IN PROGRESS |                |
| Key action 5: Foster the cooperation between forest owners and enhance education and training in forestry                                                                                                                                                                                                                            | 5.1 Support for vocational training and education of forest owners and forest workers                                                                       | IN PROGRESS |                |
|                                                                                                                                                                                                                                                                                                                                      | 5.1 Support for development of advisory services for forest owners and their associations                                                                   | IN PROGRESS |                |
|                                                                                                                                                                                                                                                                                                                                      | 5.1 Support for environmental awareness of forest owners and workers                                                                                        | IN PROGRESS |                |
| <b>For Objective 1, what are the major activities carried out in your country since 2009?</b>                                                                                                                                                                                                                                        |                                                                                                                                                             |             |                |
| KEY ACTION                                                                                                                                                                                                                                                                                                                           | ACTIVITY                                                                                                                                                    |             |                |
|                                                                                                                                                                                                                                                                                                                                      |                                                                                                                                                             |             |                |
| <p><i>Are there any additional activities or follow-up activities related to Objective 1 that you would like to highlight for the EU FAP ex-post evaluation: please describe the activity and its status.</i></p> <p><i>Additional related activities:</i></p> <p><i>Follow-up activities:</i></p> <p><i>Any other comments?</i></p> |                                                                                                                                                             |             |                |
| <b>Objective 2: Improving and protecting the environment</b>                                                                                                                                                                                                                                                                         |                                                                                                                                                             |             |                |

# EU FOREST ACTION PLAN EX-POST EVALUATION

|                                                                                                                                                                                                                                                                                                                                      |                                                                                                                                                                 |             |  |
|--------------------------------------------------------------------------------------------------------------------------------------------------------------------------------------------------------------------------------------------------------------------------------------------------------------------------------------|-----------------------------------------------------------------------------------------------------------------------------------------------------------------|-------------|--|
| Key action 6: Facilitate EU compliance with the obligations on climate change mitigation of the UNFCCC and its Kyoto Protocol and encourage adaptation to the effects of climate change                                                                                                                                              | 6.1 Joint efforts by MS to improve the forest related elements of the reporting on LULUCF to the UN FCCC by 2012                                                | N/A         |  |
|                                                                                                                                                                                                                                                                                                                                      | 6.2 Debriefing of the SFC after UN FCCC meetings and MS sinks experts' meeting                                                                                  | IN PROGRESS |  |
|                                                                                                                                                                                                                                                                                                                                      | 6.4 Activities to raise awareness on the impacts of climate change on forestry                                                                                  | IN PROGRESS |  |
|                                                                                                                                                                                                                                                                                                                                      | 6.4 Activities to address the impacts of climate change on forestry                                                                                             | IN PLANNING |  |
|                                                                                                                                                                                                                                                                                                                                      | 6.4 Activities to promote climate change mitigation and adaptation                                                                                              | IN PLANNING |  |
| Key action 7: Contribute towards achieving the revised Community biodiversity objectives for 2010 and beyond                                                                                                                                                                                                                         | 7.1 Exchange experiences on implementation of Natura 2000 in forest areas                                                                                       | N/A         |  |
|                                                                                                                                                                                                                                                                                                                                      | 7.5 Participate in joint meetings of the EU Forest and Nature Directors (GreenForce network)                                                                    | N/A         |  |
| Key action 8: Work towards a European Forest Monitoring System                                                                                                                                                                                                                                                                       | 8.1 Participate in further elaborating a European Forest Monitoring System                                                                                      | N/A         |  |
|                                                                                                                                                                                                                                                                                                                                      | 8.2 Cooperation with JRC in establishing the European Forest Data Centre                                                                                        | N/A         |  |
| Key action 9: Enhance the protection of EU forests                                                                                                                                                                                                                                                                                   | 9.1 Participate in further development of the European Forest Fire Information System                                                                           | IN PROGRESS |  |
|                                                                                                                                                                                                                                                                                                                                      | 9.3 Form groupings of MS to study particular regional problems with the condition of forests / addressing regional problems concerning the condition of forests | N/A         |  |
|                                                                                                                                                                                                                                                                                                                                      | 9.4 Support research on protection of forests and phytosanitary issues                                                                                          | IN PROGRESS |  |
| <b>For Objective 2, what are the major activities carried out in your country since 2009?</b>                                                                                                                                                                                                                                        |                                                                                                                                                                 |             |  |
| KEY ACTION                                                                                                                                                                                                                                                                                                                           | ACTIVITY                                                                                                                                                        |             |  |
|                                                                                                                                                                                                                                                                                                                                      |                                                                                                                                                                 |             |  |
| <p><i>Are there any additional activities or follow-up activities related to Objective 2 that you would like to highlight for the EU FAP ex-post evaluation: please describe the activity and its status.</i></p> <p><i>Additional related activities:</i></p> <p><i>Follow-up activities:</i></p> <p><i>Any other comments?</i></p> |                                                                                                                                                                 |             |  |
| <b>Objective 3: Contributing to quality of life</b>                                                                                                                                                                                                                                                                                  |                                                                                                                                                                 |             |  |
| Key action 10: Encourage environmental education and information                                                                                                                                                                                                                                                                     | 10.1 Conduct environmental education and information campaigns                                                                                                  | IN PROGRESS |  |
|                                                                                                                                                                                                                                                                                                                                      | 10.2 Activities to promote education on sustainable forest management                                                                                           | IN PROGRESS |  |
| Key action 11: Maintain and enhance the protective functions of forests                                                                                                                                                                                                                                                              | 11.1 Implement measures to enhance the protective function of forests                                                                                           | IN PROGRESS |  |
|                                                                                                                                                                                                                                                                                                                                      | 11.3 Activities to foster natural hazard prevention                                                                                                             | IN PROGRESS |  |
| Key action 12: Explore the potential of urban and peri-urban forests                                                                                                                                                                                                                                                                 | 12.1 Studies and research projects on evaluating the social and human impacts of urban and peri-urban forests                                                   | IN PROGRESS |  |
|                                                                                                                                                                                                                                                                                                                                      | 12.2 Activities to engage local communities and non-traditional stakeholders in planning, creating, managing and using urban and peri-urban forests             | N/A         |  |

| For Objective 3, what are the major activities carried out in your country since 2009?                                                                                                                                                                                                                                               |                                                                                                                                                                                                             |             |  |
|--------------------------------------------------------------------------------------------------------------------------------------------------------------------------------------------------------------------------------------------------------------------------------------------------------------------------------------|-------------------------------------------------------------------------------------------------------------------------------------------------------------------------------------------------------------|-------------|--|
| KEY ACTION                                                                                                                                                                                                                                                                                                                           | ACTIVITY                                                                                                                                                                                                    |             |  |
| <p><i>Are there any additional activities or follow-up activities related to Objective 3 that you would like to highlight for the EU FAP ex-post evaluation: please describe the activity and its status.</i></p> <p><i>Additional related activities:</i></p> <p><i>Follow-up activities:</i></p> <p><i>Any other comments?</i></p> |                                                                                                                                                                                                             |             |  |
| <b>Objective 4: Fostering coordination and cooperation</b>                                                                                                                                                                                                                                                                           |                                                                                                                                                                                                             |             |  |
| Key action 13: Strengthen the role of the Standing Forestry Committee                                                                                                                                                                                                                                                                | 13.4 Participate in SFC ad hoc working groups for activities of the FAP                                                                                                                                     | IN PROGRESS |  |
|                                                                                                                                                                                                                                                                                                                                      | 13.5 Participate in meetings of the EU Forest Directors organised by MS holding Presidency                                                                                                                  | IN PROGRESS |  |
| Key action 16: Strengthen the EU profile in international forest-related processes                                                                                                                                                                                                                                                   | 16.1 Participation in international processes relevant to forests and forestry                                                                                                                              | IN PROGRESS |  |
| Key action 17: Encourage the use of wood and other forest products from sustainably managed forests                                                                                                                                                                                                                                  | 17.2 Developing guidelines for application of the Public Procurement Directive to forest products, in order to achieve better compatibility with each other and also in support of the EU-FLEGT Action Plan | IN PROGRESS |  |
| Key action 18: Improve information exchange and communication                                                                                                                                                                                                                                                                        | 18.1 Participate in developing a communication strategy on forestry and exchange of experience between MS on forest communication                                                                           | IN PROGRESS |  |
|                                                                                                                                                                                                                                                                                                                                      | 18.2 Develop and maintain a "forestry" site on forest-related information and link it with the Europa forestry site                                                                                         | N/A         |  |
|                                                                                                                                                                                                                                                                                                                                      | 18.3 Participate in development of a European Forest Information and Communication Platform                                                                                                                 | IN PROGRESS |  |
|                                                                                                                                                                                                                                                                                                                                      | 18.4 Organise visibility events, such as a "Forest Week" or "Forest Day" to raise awareness of the benefits of sustainable forest management                                                                | IN PROGRESS |  |
| <b>For Objective 4, what are the major activities carried out in your country since 2009?</b>                                                                                                                                                                                                                                        |                                                                                                                                                                                                             |             |  |
| KEY ACTION                                                                                                                                                                                                                                                                                                                           | ACTIVITY                                                                                                                                                                                                    |             |  |
| <p><i>Are there any additional activities or follow-up activities related to Objective 4 that you would like to highlight for the EU FAP ex-post evaluation: please describe the activity and its status.</i></p> <p><i>Additional related activities:</i></p> <p><i>Follow-up activities:</i></p> <p><i>Any other comments?</i></p> |                                                                                                                                                                                                             |             |  |

|                                                                                                                                                                                                                                                                                                                                                                                                                                                                                                                                                                                                                                                                                                                                                                                                                                                                                                                                                                                                                     |
|---------------------------------------------------------------------------------------------------------------------------------------------------------------------------------------------------------------------------------------------------------------------------------------------------------------------------------------------------------------------------------------------------------------------------------------------------------------------------------------------------------------------------------------------------------------------------------------------------------------------------------------------------------------------------------------------------------------------------------------------------------------------------------------------------------------------------------------------------------------------------------------------------------------------------------------------------------------------------------------------------------------------|
| <p><b>2. To what extent did implementation of the EU FAP activities produce perceivable effects on</b><br/> <i>Please note that the ranking provided in the question(s) below range from 1 (Not at all) to 9 (To a great extent).</i></p> <ul style="list-style-type: none"> <li>• Objective 1 - enhancing long-term competitiveness of the EU forest sector</li> <li>• Objective 2 - improving and protecting the environment</li> <li>• Objective 3 - contributing to quality of life by preserving and improving the social and cultural dimensions of forests</li> <li>• Objective 4 - improving coordination and communication</li> </ul>                                                                                                                                                                                                                                                                                                                                                                      |
| <p><b>3. Please provide examples of such effects at:</b></p>                                                                                                                                                                                                                                                                                                                                                                                                                                                                                                                                                                                                                                                                                                                                                                                                                                                                                                                                                        |
| <p><i>EU level</i></p> <p>Objective 1:<br/>         Objective 2:<br/>         Objective 3:<br/>         Objective 4:</p>                                                                                                                                                                                                                                                                                                                                                                                                                                                                                                                                                                                                                                                                                                                                                                                                                                                                                            |
| <p><i>Member State level</i></p> <p>Objective 1:<br/>         Objective 2:<br/>         Objective 3:<br/>         Objective 4:</p>                                                                                                                                                                                                                                                                                                                                                                                                                                                                                                                                                                                                                                                                                                                                                                                                                                                                                  |
| <p><i>Other levels (e.g. regional, cross-border, international)</i></p> <p>Objective 1:<br/>         Objective 2:<br/>         Objective 3:<br/>         Objective 4:</p>                                                                                                                                                                                                                                                                                                                                                                                                                                                                                                                                                                                                                                                                                                                                                                                                                                           |
| <p><b>4. Could the same results have been produced in other ways, instead of implementing the EU FAP in 2007-2011?</b></p>                                                                                                                                                                                                                                                                                                                                                                                                                                                                                                                                                                                                                                                                                                                                                                                                                                                                                          |
| <p><i>If Yes, please define alternative actions/activities/instruments/sources of funding that could have been adopted</i></p>                                                                                                                                                                                                                                                                                                                                                                                                                                                                                                                                                                                                                                                                                                                                                                                                                                                                                      |
| <p><b>5. Did you allocate in your country specific resources for EU FAP implementation in 2007-2011? Please give examples with estimates of the resources allocated.</b></p>                                                                                                                                                                                                                                                                                                                                                                                                                                                                                                                                                                                                                                                                                                                                                                                                                                        |
| <p><b>6. What were the most important financial instruments (national, regional and/or EU) to implement the reported activities in your country? Please specify for each objective.</b></p> <p>Objective 1:<br/>         Objective 2:<br/>         Objective 3:<br/>         Objective 4:</p>                                                                                                                                                                                                                                                                                                                                                                                                                                                                                                                                                                                                                                                                                                                       |
| <p><b>7. Did EU FAP influence the way in which financing was used for forest-related activities in your country in 2007-2011 – give concrete example(s) how?</b></p>                                                                                                                                                                                                                                                                                                                                                                                                                                                                                                                                                                                                                                                                                                                                                                                                                                                |
| <p><b>8. In your opinion, to what extent has the EU Forest Action Plan succeeded in:</b><br/> <i>Please note that the ranking provided in the question(s) below range from 1 (Not at all) to 9 (To a great extent).</i></p> <ul style="list-style-type: none"> <li>• supporting long-term competitiveness of the forest sector?</li> <li>• contributing to the positive environmental and health effects of forests required by global and international arrangements?</li> <li>• contributing to forest monitoring and forest protection?</li> <li>• contributing to quality of life by preserving and improving the social and cultural dimensions of forests?</li> <li>• improving coordination and coherence between different policy areas in forest sector within EU Commission?</li> <li>• improving coordination and coherence between different policy areas in forest sector between EU and Member States?</li> <li>• disseminating best practices and improving the visibility of the sector?</li> </ul> |
| <p><b>9. Are there any other comments you would like to make about the implementation of the EU Forest Action Plan Objectives 1 to 4?</b></p> <p>Objective 1:<br/>         Objective 2:<br/>         Objective 3:<br/>         Objective 4:</p>                                                                                                                                                                                                                                                                                                                                                                                                                                                                                                                                                                                                                                                                                                                                                                     |

**Improvement of coherence and cross-sectoral co-operation in implementing the EU Forestry Strategy?**

Please note that the ranking provided in the question(s) below range from 1 (Not at all) to 9 (To a great extent).

|                                                                                                                                                                                                                                                                                                                                                                                                |
|------------------------------------------------------------------------------------------------------------------------------------------------------------------------------------------------------------------------------------------------------------------------------------------------------------------------------------------------------------------------------------------------|
| <b>10. To what extent have the activities of the EU Forest Action Plan contributed to the following objectives of the EU Forestry Strategy?</b>                                                                                                                                                                                                                                                |
| <ul style="list-style-type: none"> <li>• implementation of sustainable forest management</li> <li>• implementation of international commitments, principles and recommendations</li> <li>• active participation in all forest-related international processes</li> <li>• improved coordination, communication and cooperation in all policy areas of relevance to the forest sector</li> </ul> |
| <b>11. Are you aware of any examples how the implementation of EU FAP in 2007-2011 had an impact on forest-related EU policies?</b>                                                                                                                                                                                                                                                            |
| <i>If Yes, please describe those examples. If no, please list potential reasons.</i>                                                                                                                                                                                                                                                                                                           |
| <b>12. Did implementation of EU FAP in 2007-2011 have an impact on national forest programmes or other forest-related policies in your country?</b>                                                                                                                                                                                                                                            |
| <i>If Yes, please describe how. If no, please list potential reasons.</i>                                                                                                                                                                                                                                                                                                                      |
| <b>13. In your opinion, in which way did the EU FAP improve – or where did it fail to improve – the coordination between different <u>forest-related policy areas</u>?</b>                                                                                                                                                                                                                     |
| <i>EU level</i>                                                                                                                                                                                                                                                                                                                                                                                |
| <i>Where it improved the coordination, please describe:</i>                                                                                                                                                                                                                                                                                                                                    |
| <i>Where it failed, please describe:</i>                                                                                                                                                                                                                                                                                                                                                       |
| <i>Member State level</i>                                                                                                                                                                                                                                                                                                                                                                      |
| <i>Where it improved the coordination, please describe:</i>                                                                                                                                                                                                                                                                                                                                    |
| <i>Where it failed, please describe:</i>                                                                                                                                                                                                                                                                                                                                                       |
| <i>Other levels (e.g. regional, cross-border, international)</i>                                                                                                                                                                                                                                                                                                                               |
| <i>Where it improved the coordination, please describe:</i>                                                                                                                                                                                                                                                                                                                                    |
| <i>Where it failed, please describe:</i>                                                                                                                                                                                                                                                                                                                                                       |
| <b>14. In your opinion, in which way did the EU FAP improve – or where did it fail to improve – the coordination between the EU and MS level?</b>                                                                                                                                                                                                                                              |
| <i>Where it improved the coordination, please describe:</i>                                                                                                                                                                                                                                                                                                                                    |
| <i>Where it failed, please describe:</i>                                                                                                                                                                                                                                                                                                                                                       |
| <b>15. Are there any other comments you would like to make about the coherence and cross-sectoral co-operation in implementing the EU Forestry Strategy?</b>                                                                                                                                                                                                                                   |
|                                                                                                                                                                                                                                                                                                                                                                                                |

**Economic, environmental and socio-cultural objectives related to forestry**

This section concerns how much attention was given to which dimensions of sustainable forest management in the EU FAP. This includes, how the activities were formulated and implemented, resources dedicated, objectives/targets and impacts are expected.

Please note that the ranking provided in the question(s) below range from 1 (Not at all) to 9 (To a great extent).

|                                                                                                                                                   |
|---------------------------------------------------------------------------------------------------------------------------------------------------|
| <b>16. In your opinion, how were the three dimensions of sustainable development emphasised in the implementation of the EU FAP in 2007-2011:</b> |
|---------------------------------------------------------------------------------------------------------------------------------------------------|



|                                                                                                                                                                                                                                                                                                    |                                                                                                                                                                           |
|----------------------------------------------------------------------------------------------------------------------------------------------------------------------------------------------------------------------------------------------------------------------------------------------------|---------------------------------------------------------------------------------------------------------------------------------------------------------------------------|
| <i>Please distribute 100 points between the three options</i>                                                                                                                                                                                                                                      |                                                                                                                                                                           |
| <ul style="list-style-type: none"> <li>• Economic aspect of sustainable development</li> <li>• Environmental aspect of sustainable development</li> <li>• Socio-cultural aspect of sustainable development</li> </ul> <i>Do you think the emphases should have been different, please explain:</i> |                                                                                                                                                                           |
| <b>17. To what extent has the EU FAP Implementation had an <u>impact</u> on the:</b>                                                                                                                                                                                                               |                                                                                                                                                                           |
| <ul style="list-style-type: none"> <li>• Economic aspect of sustainable development</li> <li>• Environmental aspect of sustainable development</li> <li>• Socio-cultural aspect of sustainable development</li> </ul> <i>Please explain:</i>                                                       |                                                                                                                                                                           |
| <b>18. To what extent did the EU FAP Key Actions address relevant forest-related issues in Europe</b>                                                                                                                                                                                              |                                                                                                                                                                           |
| <b>Objective 1: Improving long-term competitiveness</b>                                                                                                                                                                                                                                            |                                                                                                                                                                           |
| KA1.                                                                                                                                                                                                                                                                                               | Examine the effects of globalisation on the economic viability and competitiveness of EU forestry                                                                         |
| KA2.                                                                                                                                                                                                                                                                                               | Encourage research and technological development to enhance the competitiveness of the forest sector                                                                      |
| KA3.                                                                                                                                                                                                                                                                                               | Exchange and assess experiences on the valuation and marketing of non-wood forest goods and services                                                                      |
| KA4.                                                                                                                                                                                                                                                                                               | Promote the use of forest biomass for energy generation                                                                                                                   |
| KA5.                                                                                                                                                                                                                                                                                               | Foster the cooperation between forest owners and enhance education and training in forestry                                                                               |
| <b>Objective 2: Improving and protecting the environment</b>                                                                                                                                                                                                                                       |                                                                                                                                                                           |
| KA6.                                                                                                                                                                                                                                                                                               | Facilitate EU compliance with the obligations on climate change mitigation of the UNFCCC and its Kyoto Protocol and encourage adaptation to the effects of climate change |
| KA7.                                                                                                                                                                                                                                                                                               | Contribute towards achieving the revised Community biodiversity objectives for 2010 and beyond                                                                            |
| KA8.                                                                                                                                                                                                                                                                                               | Work towards a European Forest Monitoring System                                                                                                                          |
| KA9.                                                                                                                                                                                                                                                                                               | Enhance the protection of EU forests                                                                                                                                      |
| <b>Objective 3: Contributing to quality of life</b>                                                                                                                                                                                                                                                |                                                                                                                                                                           |
| KA10.                                                                                                                                                                                                                                                                                              | Encourage environmental education and information                                                                                                                         |
| KA11.                                                                                                                                                                                                                                                                                              | Maintain and enhance the protective functions of forests                                                                                                                  |
| KA12.                                                                                                                                                                                                                                                                                              | Explore the potential of urban and peri-urban forests                                                                                                                     |
| <b>Objective 4: Fostering coordination and cooperation</b>                                                                                                                                                                                                                                         |                                                                                                                                                                           |
| KA13.                                                                                                                                                                                                                                                                                              | Strengthen the role of the Standing Forestry Committee                                                                                                                    |
| KA14.                                                                                                                                                                                                                                                                                              | Strengthen coordination between policy areas in forest-related matters                                                                                                    |
| KA15.                                                                                                                                                                                                                                                                                              | Apply the open method of coordination (OMC) to national forest programmes                                                                                                 |
| KA16.                                                                                                                                                                                                                                                                                              | Strengthen the EU profile in international forest-related processes                                                                                                       |
| KA17.                                                                                                                                                                                                                                                                                              | Encourage the use of wood and other forest products from sustainably managed forests                                                                                      |
| KA18.                                                                                                                                                                                                                                                                                              | Improve information exchange and communication                                                                                                                            |
| <b>19. Did the implementation of the EU FAP in 2007-2011 lead to achieving synergies – or did it lead increasing conflicts – between the three dimensions of sustainability:</b>                                                                                                                   |                                                                                                                                                                           |
| <ul style="list-style-type: none"> <li>• Economic aspect of sustainable development</li> <li>• Environmental aspect of sustainable development</li> <li>• Socio-cultural aspect of sustainable development</li> </ul>                                                                              |                                                                                                                                                                           |
| <i>If Yes, give examples:</i>                                                                                                                                                                                                                                                                      |                                                                                                                                                                           |
| <i>Synergies:</i>                                                                                                                                                                                                                                                                                  |                                                                                                                                                                           |
| <i>Conflicts:</i>                                                                                                                                                                                                                                                                                  |                                                                                                                                                                           |
| <b>20. Are there any other comments you would like to make about the EU Forest Action Plan contribution to balance economic, environmental and socio-cultural objectives related to forestry?</b>                                                                                                  |                                                                                                                                                                           |
|                                                                                                                                                                                                                                                                                                    |                                                                                                                                                                           |

**Added value in implementing the EU Forestry Strategy**

This section concerns the relevance of the EU FAP in covering and supporting priorities given in the forestry strategy, particularly those that are not dealt with through other policies.

|                                                                                                                                                                                                                               |
|-------------------------------------------------------------------------------------------------------------------------------------------------------------------------------------------------------------------------------|
| <b>21. What is the main added value achieved until now by the EU Forest Action Plan in terms of</b>                                                                                                                           |
| <i>...implementing the EU Forestry Strategy and improving the visibility of the forest sector?</i>                                                                                                                            |
| <i>...facilitating coherence and coordination of activities between different Community actions?</i>                                                                                                                          |
| <i>...facilitating coordination of activities between the Commission and Member States?</i>                                                                                                                                   |
| <i>...any other issues?</i>                                                                                                                                                                                                   |
| <b>22. In how far did the EU FAP implementation respond to key policy developments relevant to forests and forestry in Europe during 2007-2011?<br/>Please give examples where it responded and where it failed to do so.</b> |
| <i>To which policy developments did the EU FAP respond and how:</i>                                                                                                                                                           |
| <i>To which policy developments did the EU FAP fail to respond:</i>                                                                                                                                                           |
| <b>23. Do you know of any activities initiated by other national or regional authorities (besides your Ministry) or national NGOs that contributed to the EU FAP objectives in your country?</b>                              |
| <b>24. Are there any other comments you would like to make about the added value of the EU FAP in implementing the EU Forestry Strategy?</b>                                                                                  |

**Relevance of current objectives, key actions and activities of the EU Forest Action Plan**

This section refers to the contents of the EU FAP activities. For example, were the foreseen goals and measures still relevant when looking at the basic aims of the Forestry Strategy as well as the current policy framework and the future challenges and needs faced by forests and the forest sector? It also refers to the nature and structure of the instruments chosen and the organisational set-up of the EU FAP and its appropriateness to tackle those needs.

Relevance is understood as the extent to which the EU FAP activities are consistent with current and/or future needs of stakeholders.

|                                                                                                                                                                                                            |
|------------------------------------------------------------------------------------------------------------------------------------------------------------------------------------------------------------|
| <b>25. In your opinion, to what extent have forestry related policy priorities changed during the implementation of EU FAP 2007-2011?</b>                                                                  |
| <i>In the EU as a whole?</i>                                                                                                                                                                               |
| <i>Please describe:</i>                                                                                                                                                                                    |
| <i>In your country?</i>                                                                                                                                                                                    |
| <i>Please describe:</i>                                                                                                                                                                                    |
| <b>26. To what extent did implementation of the EU FAP in 2007-2011 address these changes in policy priorities, including new and emerging forest-related issues?</b>                                      |
| <i>In the EU as a whole?</i>                                                                                                                                                                               |
| <i>If Yes, please list them all:</i>                                                                                                                                                                       |
| <i>In your country?</i>                                                                                                                                                                                    |
| <i>If Yes, please list them all:</i>                                                                                                                                                                       |
| <b>27. In the EU Forest Action Plan and its work programme 2007-2011, the Lead Actors in implementing the Action Plan are the Commission and the Member States. The Standing Forestry Committee is the</b> |

|                                                                                                                                                                                                                                                                                                                                                                 |                                                                                                                                                   |
|-----------------------------------------------------------------------------------------------------------------------------------------------------------------------------------------------------------------------------------------------------------------------------------------------------------------------------------------------------------------|---------------------------------------------------------------------------------------------------------------------------------------------------|
| <b>coordinating body between the Commission and the Member States, and collaboration with stakeholders on implementation of the Action Plan at Community level is channelled mainly through the Advisory Group on Forestry and Cork. Did this organisational set-up support the implementation of the EU FAP or should it have been done in some other way?</b> |                                                                                                                                                   |
|                                                                                                                                                                                                                                                                                                                                                                 |                                                                                                                                                   |
| <i>Give examples of good practices created during 2007-2011</i>                                                                                                                                                                                                                                                                                                 |                                                                                                                                                   |
|                                                                                                                                                                                                                                                                                                                                                                 |                                                                                                                                                   |
| <i>Give examples of shortcomings in implementation</i>                                                                                                                                                                                                                                                                                                          |                                                                                                                                                   |
|                                                                                                                                                                                                                                                                                                                                                                 |                                                                                                                                                   |
| <i>If appropriate, give examples of alternative ways of achieving cooperation and collaboration</i>                                                                                                                                                                                                                                                             |                                                                                                                                                   |
|                                                                                                                                                                                                                                                                                                                                                                 |                                                                                                                                                   |
| 28.                                                                                                                                                                                                                                                                                                                                                             | <b>In your opinion, what are the main emerging <u>future</u> policy issues, societal needs and challenges facing the forest sector in Europe?</b> |
|                                                                                                                                                                                                                                                                                                                                                                 |                                                                                                                                                   |
| 29.                                                                                                                                                                                                                                                                                                                                                             | <b>Are there any specific lessons learned that you think should be taken into consideration if a new EU Forest Action Plan is established?</b>    |
|                                                                                                                                                                                                                                                                                                                                                                 |                                                                                                                                                   |
| 30.                                                                                                                                                                                                                                                                                                                                                             | <b>Are there any other comments you would like to make about the relevance of the EU Forest Action Plan?</b>                                      |
|                                                                                                                                                                                                                                                                                                                                                                 |                                                                                                                                                   |

## 2.2. Commission Services questionnaire

Following below is a copy of the survey that was distributed to the EU Commission Services. Please note that the guidance to the questionnaire has not been included in the below version of the questionnaire shared with EU Member States.

### Background information

|    |                                                                                                                                                                                                                                                                                                                                                                                              |  |
|----|----------------------------------------------------------------------------------------------------------------------------------------------------------------------------------------------------------------------------------------------------------------------------------------------------------------------------------------------------------------------------------------------|--|
| 1. | <b>Name:</b>                                                                                                                                                                                                                                                                                                                                                                                 |  |
| 2. | <b>Position:</b>                                                                                                                                                                                                                                                                                                                                                                             |  |
| 3. | <b>Organisation:</b>                                                                                                                                                                                                                                                                                                                                                                         |  |
| 4. | <b>Tel. &amp; e-mail:</b>                                                                                                                                                                                                                                                                                                                                                                    |  |
| 5. | <b>Other respondents involved in compiling the response:</b>                                                                                                                                                                                                                                                                                                                                 |  |
| 6. | <b>What was your organisation's role in the implementation of the EU Forest Action Plan and its Key Actions in 2007-2011?</b>                                                                                                                                                                                                                                                                |  |
|    |                                                                                                                                                                                                                                                                                                                                                                                              |  |
| 7. | <b>Please indicate which Action Plan Objective(s) your organisation was intended to contribute to:*</b>                                                                                                                                                                                                                                                                                      |  |
|    | <ul style="list-style-type: none"> <li>Objective 1 - enhancing long-term competitiveness of the EU forest sector</li> <li>Objective 2 - improving and protecting the environment</li> <li>Objective 3 - contributing to quality of life by preserving and improving the social and cultural dimensions of forests</li> <li>Objective 4 - improving coordination and communication</li> </ul> |  |
| 8. | <b>Please explain as necessary:</b>                                                                                                                                                                                                                                                                                                                                                          |  |
|    |                                                                                                                                                                                                                                                                                                                                                                                              |  |

\* A list of all EU FAP activities is included in the Annex.

### Effectiveness and efficiency of the EU Forest Action Plan

|    |                                                                                                                                                                                                                                                                                                                              |
|----|------------------------------------------------------------------------------------------------------------------------------------------------------------------------------------------------------------------------------------------------------------------------------------------------------------------------------|
| 9. | <b>To what extent did implementation of the EU FAP activities produce perceivable effects on</b><br><i>Please note that the ranking provided in the question(s) below range from 1 (Not at all) to 9 (To a great extent).</i>                                                                                                |
|    | <ul style="list-style-type: none"> <li>Objective 1 - enhancing long-term competitiveness of the EU forest sector</li> <li>Objective 2 - improving and protecting the environment</li> <li>Objective 3 - contributing to quality of life by preserving and improving the social and cultural dimensions of forests</li> </ul> |

|                                                                                                                                                                                                                                                                                                                                                                                                                                                                                                                                                                                                                                                                                                                                                                           |
|---------------------------------------------------------------------------------------------------------------------------------------------------------------------------------------------------------------------------------------------------------------------------------------------------------------------------------------------------------------------------------------------------------------------------------------------------------------------------------------------------------------------------------------------------------------------------------------------------------------------------------------------------------------------------------------------------------------------------------------------------------------------------|
| <ul style="list-style-type: none"> <li>Objective 4 - improving coordination and communication</li> </ul>                                                                                                                                                                                                                                                                                                                                                                                                                                                                                                                                                                                                                                                                  |
| <b>Please provide examples of such effects at:</b>                                                                                                                                                                                                                                                                                                                                                                                                                                                                                                                                                                                                                                                                                                                        |
| <i>EU level</i>                                                                                                                                                                                                                                                                                                                                                                                                                                                                                                                                                                                                                                                                                                                                                           |
| Objective 1:                                                                                                                                                                                                                                                                                                                                                                                                                                                                                                                                                                                                                                                                                                                                                              |
| Objective 2:                                                                                                                                                                                                                                                                                                                                                                                                                                                                                                                                                                                                                                                                                                                                                              |
| Objective 3:                                                                                                                                                                                                                                                                                                                                                                                                                                                                                                                                                                                                                                                                                                                                                              |
| Objective 4:                                                                                                                                                                                                                                                                                                                                                                                                                                                                                                                                                                                                                                                                                                                                                              |
| <i>Member State level</i>                                                                                                                                                                                                                                                                                                                                                                                                                                                                                                                                                                                                                                                                                                                                                 |
| Objective 1:                                                                                                                                                                                                                                                                                                                                                                                                                                                                                                                                                                                                                                                                                                                                                              |
| Objective 2:                                                                                                                                                                                                                                                                                                                                                                                                                                                                                                                                                                                                                                                                                                                                                              |
| Objective 3:                                                                                                                                                                                                                                                                                                                                                                                                                                                                                                                                                                                                                                                                                                                                                              |
| Objective 4:                                                                                                                                                                                                                                                                                                                                                                                                                                                                                                                                                                                                                                                                                                                                                              |
| <i>Other levels (e.g. regional, cross-border, international)</i>                                                                                                                                                                                                                                                                                                                                                                                                                                                                                                                                                                                                                                                                                                          |
| Objective 1:                                                                                                                                                                                                                                                                                                                                                                                                                                                                                                                                                                                                                                                                                                                                                              |
| Objective 2:                                                                                                                                                                                                                                                                                                                                                                                                                                                                                                                                                                                                                                                                                                                                                              |
| Objective 3:                                                                                                                                                                                                                                                                                                                                                                                                                                                                                                                                                                                                                                                                                                                                                              |
| Objective 4:                                                                                                                                                                                                                                                                                                                                                                                                                                                                                                                                                                                                                                                                                                                                                              |
| <b>10. Could the same results have been produced in other ways, instead of implementing the EU FAP in 2007-2011?</b>                                                                                                                                                                                                                                                                                                                                                                                                                                                                                                                                                                                                                                                      |
| If Yes, please define alternative actions/activities/instruments/sources of funding that could have been adopted                                                                                                                                                                                                                                                                                                                                                                                                                                                                                                                                                                                                                                                          |
| <b>11. To what extent has the EU Forest Action Plan succeeded in:</b><br><i>Please note that the ranking provided in the question(s) below range from 1 (Not at all) to 9 (To a great extent).</i>                                                                                                                                                                                                                                                                                                                                                                                                                                                                                                                                                                        |
| <ul style="list-style-type: none"> <li>supporting long-term competitiveness of the forest sector?</li> <li>contributing to the positive environmental and health effects of forests required by global and international arrangements?</li> <li>contributing to forest monitoring and forest protection?</li> <li>contributing to quality of life by preserving and improving the social and cultural dimensions of forests?</li> <li>improving coordination and coherence between different policy areas in forest sector within EU Commission?</li> <li>improving coordination and coherence between different policy areas in forest sector between EU and Member States?</li> <li>disseminating best practices and improving the visibility of the sector?</li> </ul> |
| <b>12. Are there any other comments you would like to make about the implementation of the EU Forest Action Plan Objectives 1 to 4?</b>                                                                                                                                                                                                                                                                                                                                                                                                                                                                                                                                                                                                                                   |
| Objective 1:                                                                                                                                                                                                                                                                                                                                                                                                                                                                                                                                                                                                                                                                                                                                                              |
| Objective 2:                                                                                                                                                                                                                                                                                                                                                                                                                                                                                                                                                                                                                                                                                                                                                              |
| Objective 3:                                                                                                                                                                                                                                                                                                                                                                                                                                                                                                                                                                                                                                                                                                                                                              |
| Objective 4:                                                                                                                                                                                                                                                                                                                                                                                                                                                                                                                                                                                                                                                                                                                                                              |

#### Improvement of coherence and cross-sectoral co-operation in implementing the EU Forestry Strategy?

|                                                                                                                                                                                                                                                                                                                                                                                        |
|----------------------------------------------------------------------------------------------------------------------------------------------------------------------------------------------------------------------------------------------------------------------------------------------------------------------------------------------------------------------------------------|
| <b>13. To what extent have the activities of the EU Forest Action Plan contributed to the following objectives of the EU Forestry Strategy?</b><br><i>Please note that the ranking provided in the question(s) below range from 1 (Not at all) to 9 (To a great extent).</i>                                                                                                           |
| <ul style="list-style-type: none"> <li>implementation of sustainable forest management</li> <li>implementation of international commitments, principles and recommendations</li> <li>active participation in all forest-related international processes</li> <li>improved coordination, communication and cooperation in all policy areas of relevance to the forest sector</li> </ul> |
| <b>14. Are you aware of any examples how the implementation of EU FAP in 2007-2011 had an impact on forest-related EU policies?</b>                                                                                                                                                                                                                                                    |
| <i>If Yes, please describe those examples. If no, please list potential reasons.</i>                                                                                                                                                                                                                                                                                                   |

|                                                                                                                                                              |
|--------------------------------------------------------------------------------------------------------------------------------------------------------------|
| <b>15. Did implementation of EU FAP in 2007-2011 have an impact on national forest programmes or other forest-related policies?</b>                          |
| <i>If Yes, please describe how. If no, please list potential reasons.</i>                                                                                    |
| <b>16. In your opinion, in which way did the EU FAP improve – or where did it fail to improve – the coordination between the EU and MS level?</b>            |
| <i>Where it improved the coordination, please describe:</i>                                                                                                  |
| <i>Where it failed, please describe:</i>                                                                                                                     |
| <b>17. Are there any other comments you would like to make about the coherence and cross-sectoral co-operation in implementing the EU Forestry Strategy?</b> |
|                                                                                                                                                              |

## Economic, environmental and socio-cultural objectives related to forestry

|                                                                                                                                                                                                                                                                                                    |
|----------------------------------------------------------------------------------------------------------------------------------------------------------------------------------------------------------------------------------------------------------------------------------------------------|
| <b>18. In your opinion, how were the three dimensions of sustainable development emphasised in the implementation of the EU FAP in 2007-2011:</b><br><i>Please distribute 100 points between the three options</i>                                                                                 |
| <ul style="list-style-type: none"> <li>• Economic aspect of sustainable development</li> <li>• Environmental aspect of sustainable development</li> <li>• Socio-cultural aspect of sustainable development</li> </ul> <i>Do you think the emphases should have been different, please explain:</i> |
| <b>19. To what extent has the EU FAP Implementation had an <u>impact</u> on the:</b><br><i>Please note that the ranking provided in the question(s) below range from 1 (Not at all) to 9 (To a great extent).</i>                                                                                  |
| <ul style="list-style-type: none"> <li>• Economic aspect of sustainable development</li> <li>• Environmental aspect of sustainable development</li> <li>• Socio-cultural aspect of sustainable development</li> </ul> <i>Please explain:</i>                                                       |
| <b>20. To what extent did the EU FAP Key Actions address relevant forest-related issues in Europe</b><br><i>Please note that the ranking provided in the question(s) below range from 1 (Not at all) to 9 (To a great extent).</i>                                                                 |
| <b>Objective 1: Improving long-term competitiveness</b>                                                                                                                                                                                                                                            |
| KA1. Examine the effects of globalisation on the economic viability and competitiveness of EU forestry                                                                                                                                                                                             |
| KA2. Encourage research and technological development to enhance the competitiveness of the forest sector                                                                                                                                                                                          |
| KA3. Exchange and assess experiences on the valuation and marketing of non-wood forest goods and services                                                                                                                                                                                          |
| KA4. Promote the use of forest biomass for energy generation                                                                                                                                                                                                                                       |
| KA5. Foster the cooperation between forest owners and enhance education and training in forestry                                                                                                                                                                                                   |
| <b>Objective 2: Improving and protecting the environment</b>                                                                                                                                                                                                                                       |
| KA6. Facilitate EU compliance with the obligations on climate change mitigation of the UNFCCC and its Kyoto Protocol and encourage adaptation to the effects of climate change                                                                                                                     |
| KA7. Contribute towards achieving the revised Community biodiversity objectives for 2010 and beyond                                                                                                                                                                                                |
| KA8. Work towards a European Forest Monitoring System                                                                                                                                                                                                                                              |
| KA9. Enhance the protection of EU forests                                                                                                                                                                                                                                                          |
| <b>Objective 3: Contributing to quality of life</b>                                                                                                                                                                                                                                                |
| KA10. Encourage environmental education and information                                                                                                                                                                                                                                            |
| KA11. Maintain and enhance the protective functions of forests                                                                                                                                                                                                                                     |
| KA12. Explore the potential of urban and peri-urban forests                                                                                                                                                                                                                                        |
| <b>Objective 4: Fostering coordination and cooperation</b>                                                                                                                                                                                                                                         |
| KA13. Strengthen the role of the Standing Forestry Committee                                                                                                                                                                                                                                       |
| KA14. Strengthen coordination between policy areas in forest-related matters                                                                                                                                                                                                                       |

|                                                                                                                                                                                                                       |
|-----------------------------------------------------------------------------------------------------------------------------------------------------------------------------------------------------------------------|
| KA15. Apply the open method of coordination (OMC) to national forest programmes                                                                                                                                       |
| KA16. Strengthen the EU profile in international forest-related processes                                                                                                                                             |
| KA17. Encourage the use of wood and other forest products from sustainably managed forests                                                                                                                            |
| KA18. Improve information exchange and communication                                                                                                                                                                  |
| <b>21. Did the implementation of the EU FAP in 2007-2011 lead to achieving synergies – or did it lead to increasing conflicts – between the three dimensions of sustainability:</b>                                   |
| <ul style="list-style-type: none"> <li>• Economic aspect of sustainable development</li> <li>• Environmental aspect of sustainable development</li> <li>• Socio-cultural aspect of sustainable development</li> </ul> |
| <i>If Yes, give examples:</i>                                                                                                                                                                                         |
| <i>Synergies:</i>                                                                                                                                                                                                     |
| <i>Conflicts:</i>                                                                                                                                                                                                     |
| <b>22. Are there any other comments you would like to make about the EU Forest Action Plan contribution to balance economic, environmental and socio-cultural objectives related to forestry?</b>                     |
|                                                                                                                                                                                                                       |

### Added value in implementing the EU Forestry Strategy

This section concern the relevance of the EU FAP in covering and supporting priorities given in the forestry strategy, particularly those that are not dealt with through other policies.

|                                                                                                                                                     |
|-----------------------------------------------------------------------------------------------------------------------------------------------------|
| <b>23. What is the main added value achieved until now by the EU Forest Action Plan in terms of</b>                                                 |
| <i>...implementing the EU Forestry Strategy and improving the visibility of the forest sector?</i>                                                  |
|                                                                                                                                                     |
| <i>...facilitating coherence and coordination of activities between different Community actions?</i>                                                |
|                                                                                                                                                     |
| <i>...facilitating coordination of activities between the Commission and Member States?</i>                                                         |
|                                                                                                                                                     |
| <i>...any other issues?</i>                                                                                                                         |
|                                                                                                                                                     |
| <b>24. In how far did the EU FAP implementation respond to key policy developments relevant to forests and forestry in Europe during 2007-2011?</b> |
| <b>Please give examples where it responded and where it failed to do so.</b>                                                                        |
| <i>To which policy developments did the EU FAP respond and how:</i>                                                                                 |
|                                                                                                                                                     |
| <i>To which policy developments did the EU FAP fail to respond:</i>                                                                                 |
|                                                                                                                                                     |
| <b>25. Are there any other comments you would like to make about the added value of the EU FAP in implementing the EU Forestry Strategy?</b>        |
|                                                                                                                                                     |

### Relevance of current objectives, key actions and activities of the EU Forest Action Plan

This section refers to the contents of the EU FAP activities. For example, were the foreseen goals and measures still relevant when looking at the basic aims of the Forestry Strategy as well as the current policy framework and the future challenges and needs faced by forests and the forest sector? It also refers to the nature and structure of the instruments chosen and the organisational set-up of the EU FAP and its appropriateness to tackle those needs.

Relevance is understood as the extent to which the EU FAP activities are consistent with current and/or future needs of stakeholders.

|                                                                                                                                           |
|-------------------------------------------------------------------------------------------------------------------------------------------|
| <b>26. In your opinion, to what extent have forestry related policy priorities changed during the implementation of EU FAP 2007-2011?</b> |
| <i>Please note that the ranking provided in the question(s) below range from</i>                                                          |
| <i><u>1 (Not at all) to 9 (To a great extent).</u></i>                                                                                    |
| <i>In the EU as a whole?</i>                                                                                                              |
|                                                                                                                                           |

|                                                                                                                                                                                                                                                                                                                                                                                                                                                                                                                                                                                                                                                                                                  |
|--------------------------------------------------------------------------------------------------------------------------------------------------------------------------------------------------------------------------------------------------------------------------------------------------------------------------------------------------------------------------------------------------------------------------------------------------------------------------------------------------------------------------------------------------------------------------------------------------------------------------------------------------------------------------------------------------|
| <i>Please describe:</i>                                                                                                                                                                                                                                                                                                                                                                                                                                                                                                                                                                                                                                                                          |
| <b>27. To what extent did implementation of the EU FAP in 2007-2011 address these changes in policy priorities, including new and emerging forest-related issues?</b>                                                                                                                                                                                                                                                                                                                                                                                                                                                                                                                            |
| <i>In the EU as a whole?</i>                                                                                                                                                                                                                                                                                                                                                                                                                                                                                                                                                                                                                                                                     |
| <i>If Yes, please list them all:</i>                                                                                                                                                                                                                                                                                                                                                                                                                                                                                                                                                                                                                                                             |
| <b>28. In the EU Forest Action Plan and its work programme 2007-2011, the Lead Actors in implementing the Action Plan are the Commission and the Member States. The Standing Forestry Committee is the coordinating body between the Commission and the Member States, and collaboration with stakeholders on implementation of the Action Plan at Community level is channelled mainly through the Advisory Group on Forestry and Cork. Did this organisational set-up support the implementation of the EU FAP or should it have been done in some other way?</b><br><i>Please note that the ranking provided in the question(s) below range from 1 (Not at all) to 9 (To a great extent).</i> |
| <i>Give examples of good practices created during 2007-2011</i>                                                                                                                                                                                                                                                                                                                                                                                                                                                                                                                                                                                                                                  |
| <i>Give examples of shortcomings in implementation</i>                                                                                                                                                                                                                                                                                                                                                                                                                                                                                                                                                                                                                                           |
| <i>If appropriate, give examples of alternative ways of achieving cooperation and collaboration</i>                                                                                                                                                                                                                                                                                                                                                                                                                                                                                                                                                                                              |
| <b>29. In your opinion, what are the main emerging <u>future</u> policy issues, societal needs and challenges facing the forest sector in Europe?</b>                                                                                                                                                                                                                                                                                                                                                                                                                                                                                                                                            |
| <b>30. Are there any other comments you would like to make about the relevance of the EU Forest Action Plan?</b>                                                                                                                                                                                                                                                                                                                                                                                                                                                                                                                                                                                 |

## ANNEX. Activities of the EU FAP

| KEY ACTION                                                                                                                                                                              | ACTIVITY                                                                                                                                                    |
|-----------------------------------------------------------------------------------------------------------------------------------------------------------------------------------------|-------------------------------------------------------------------------------------------------------------------------------------------------------------|
| <b>Objective 1: Improving long-term competitiveness</b>                                                                                                                                 |                                                                                                                                                             |
| Key action 1: Examine the effects of globalisation on the economic viability and competitiveness of EU forestry                                                                         | 1.2 Raising awareness of factors affecting competitiveness of forestry in the EU                                                                            |
| Key Action 2: Encourage research and technological development to enhance the competitiveness of the forest sector                                                                      | 2.3 Implementation of the Forest-based sector Technology Platform (FTP) Strategic Research Agenda SRA / National Research Agenda NRA                        |
| Key Action 3: Exchange and assess experiences on the valuation and marketing of non-wood forest goods and services                                                                      | 3.1 Carry out studies and pilot projects on valuation, compensation and innovative marketing of non-wood forest goods and services, including methodologies |
| Key action 4: Promote the use of forest biomass for energy generation                                                                                                                   | 4.1 Improve the mobilisation and efficient use of wood and wood residues, including low-value timber / e.g. National Biomass Action Plan                    |
|                                                                                                                                                                                         | 4.2 Developing cooperation methods and mechanisms between forest owners in energy markets                                                                   |
|                                                                                                                                                                                         | 4.4 Utilise EARDF resources in rural development programmes for promoting the use of forest biomass for energy generation                                   |
| Key action 5: Foster the cooperation between forest owners and enhance education and training in forestry                                                                               | 5.1 Support for vocational training and education of forest owners and forest workers                                                                       |
|                                                                                                                                                                                         | 5.1 Support for development of advisory services for forest owners and their associations                                                                   |
|                                                                                                                                                                                         | 5.1 Support for environmental awareness of forest owners and workers                                                                                        |
| <b>Objective 2: Improving and protecting the environment</b>                                                                                                                            |                                                                                                                                                             |
| Key action 6: Facilitate EU compliance with the obligations on climate change mitigation of the UNFCCC and its Kyoto Protocol and encourage adaptation to the effects of climate change | 6.1 Joint efforts by MS to improve the forest related elements of the reporting on LULUCF to the UN FCCC by 2012                                            |
|                                                                                                                                                                                         | 6.2 Debriefing of the SFC after UN FCCC meetings and MS sinks experts' meeting                                                                              |

|                                                                                                              |                                                                                                                                                                                                             |
|--------------------------------------------------------------------------------------------------------------|-------------------------------------------------------------------------------------------------------------------------------------------------------------------------------------------------------------|
|                                                                                                              | 6.4 Activities to raise awareness on the impacts of climate change on forestry                                                                                                                              |
|                                                                                                              | 6.4 Activities to address the impacts of climate change on forestry                                                                                                                                         |
|                                                                                                              | 6.4 Activities to promote climate change mitigation and adaptation                                                                                                                                          |
| Key action 7: Contribute towards achieving the revised Community biodiversity objectives for 2010 and beyond | 7.1 Exchange experiences on implementation of Natura 2000 in forest areas                                                                                                                                   |
|                                                                                                              | 7.5 Participate in joint meetings of the EU Forest and Nature Directors (GreenForce network)                                                                                                                |
| Key action 8: Work towards a European Forest Monitoring System                                               | 8.1 Participate in further elaborating a European Forest Monitoring System                                                                                                                                  |
|                                                                                                              | 8.2 Cooperation with JRC in establishing the European Forest Data Centre                                                                                                                                    |
| Key action 9: Enhance the protection of EU forests                                                           | 9.1 Participate in further development of the European Forest Fire Information System                                                                                                                       |
|                                                                                                              | 9.3 Form groupings of MS to study particular regional problems with the condition of forests / addressing regional problems concerning the condition of forests                                             |
|                                                                                                              | 9.4 Support research on protection of forests and phytosanitary issues                                                                                                                                      |
| <b>Objective 3: Contributing to quality of life</b>                                                          |                                                                                                                                                                                                             |
| Key action 10: Encourage environmental education and information                                             | 10.1 Conduct environmental education and information campaigns                                                                                                                                              |
|                                                                                                              | 10.2 Activities to promote education on sustainable forest management                                                                                                                                       |
| Key action 11: Maintain and enhance the protective functions of forests                                      | 11.1 Implement measures to enhance the protective function of forests                                                                                                                                       |
|                                                                                                              | 11.3 Activities to foster natural hazard prevention                                                                                                                                                         |
| Key action 12: Explore the potential of urban and peri-urban forests                                         | 12.1 Studies and research projects on evaluating the social and human impacts of urban and peri-urban forests                                                                                               |
|                                                                                                              | 12.2 Activities to engage local communities and non-traditional stakeholders in planning, creating, managing and using urban and peri-urban forests                                                         |
| <b>Objective 4: Fostering coordination and cooperation</b>                                                   |                                                                                                                                                                                                             |
| Key action 13: Strengthen the role of the Standing Forestry Committee                                        | 13.4 Participate in SFC ad hoc working groups for activities of the FAP                                                                                                                                     |
|                                                                                                              | 13.5 Participate in meetings of the EU Forest Directors organised by MS holding Presidency                                                                                                                  |
| Key action 16: Strengthen the EU profile in international forest-related processes                           | 16.1 Participation in international processes relevant to forests and forestry                                                                                                                              |
| Key action 17: Encourage the use of wood and other forest products from sustainably managed forests          | 17.2 Developing guidelines for application of the Public Procurement Directive to forest products, in order to achieve better compatibility with each other and also in support of the EU-FLEGT Action Plan |
| Key action 18: Improve information exchange and communication                                                | 18.1 Participate in developing a communication strategy on forestry and exchange of experience between MS on forest communication                                                                           |
|                                                                                                              | 18.2 Develop and maintain a "forestry" site on forest-related information and link it with the Europa forestry site                                                                                         |
|                                                                                                              | 18.3 Participate in development of a European Forest Information and Communication Platform                                                                                                                 |
|                                                                                                              | 18.4 Organise visibility events, such as a "Forest Week" or "Forest Day" to raise awareness of the benefits of sustainable forest management                                                                |



## 2.4. Stakeholder questionnaire

Following below is a copy of the survey that was distributed to relevant stakeholders. Please note that the guidance to the questionnaire has not been included in the below version of the questionnaire shared with EU Member States.

### Background information

|                                                                                                                                                                                                                                                                                                                                                                                                                                                                                                                                                                                                                                                                                                                    |  |
|--------------------------------------------------------------------------------------------------------------------------------------------------------------------------------------------------------------------------------------------------------------------------------------------------------------------------------------------------------------------------------------------------------------------------------------------------------------------------------------------------------------------------------------------------------------------------------------------------------------------------------------------------------------------------------------------------------------------|--|
| <b>1. Name:</b>                                                                                                                                                                                                                                                                                                                                                                                                                                                                                                                                                                                                                                                                                                    |  |
| <b>2. E-mail:</b>                                                                                                                                                                                                                                                                                                                                                                                                                                                                                                                                                                                                                                                                                                  |  |
| <b>3. Your position:</b>                                                                                                                                                                                                                                                                                                                                                                                                                                                                                                                                                                                                                                                                                           |  |
| <b>4. What type of organisation do you work for?</b><br>Stakeholder participation in the EU FAP implementation is channelled mainly through Advisory Group on Forestry and Cork (AGFC). There are in total 49 seats in AGFC divided between producers (i.e. public and private forest owners, land owners, agricultural organisations etc.), industry (i.e. wood working industries, pulp and paper, cork), environmental NGOs, traders, workers (i.e. trade union, foresters) and consumer groups. Please choose which of these groups your organization belongs, or if other, please indicate what (e.g. research & development, education & training).<br><br>Choose one of the following answers<br><br>Other: |  |
| <b>5. Name of organisation:</b>                                                                                                                                                                                                                                                                                                                                                                                                                                                                                                                                                                                                                                                                                    |  |
| <b>6. Country of origin:</b>                                                                                                                                                                                                                                                                                                                                                                                                                                                                                                                                                                                                                                                                                       |  |
| <b>7. What has been your organisation's role in the implementation of the EU Forest Action Plan and its Key Actions?:</b>                                                                                                                                                                                                                                                                                                                                                                                                                                                                                                                                                                                          |  |
|                                                                                                                                                                                                                                                                                                                                                                                                                                                                                                                                                                                                                                                                                                                    |  |
| <b>8. Has your organisation produced position papers, statements, reports or other material regarding the implementation of the EU Forest Action Plan?</b>                                                                                                                                                                                                                                                                                                                                                                                                                                                                                                                                                         |  |
|                                                                                                                                                                                                                                                                                                                                                                                                                                                                                                                                                                                                                                                                                                                    |  |
| <i>If these materials are publicly available, please provide further information so that the materials can be taken into account in the ex-post evaluation of the EU FAP:</i>                                                                                                                                                                                                                                                                                                                                                                                                                                                                                                                                      |  |
|                                                                                                                                                                                                                                                                                                                                                                                                                                                                                                                                                                                                                                                                                                                    |  |
| <b>9. Are you aware about the implementation of the EU FAP in 2007-2011?</b>                                                                                                                                                                                                                                                                                                                                                                                                                                                                                                                                                                                                                                       |  |
|                                                                                                                                                                                                                                                                                                                                                                                                                                                                                                                                                                                                                                                                                                                    |  |
| <i>In your opinion, please indicate the three most important results of the implementation of the EU FAP during 2007-2011?</i>                                                                                                                                                                                                                                                                                                                                                                                                                                                                                                                                                                                     |  |
|                                                                                                                                                                                                                                                                                                                                                                                                                                                                                                                                                                                                                                                                                                                    |  |

### Effectiveness and efficiency of the EU Forest Action Plan

|                                                                                                                                                                                                                                                                                                                                                                                                                                                                                                                                                                                                                                                                                                                                                                                         |  |
|-----------------------------------------------------------------------------------------------------------------------------------------------------------------------------------------------------------------------------------------------------------------------------------------------------------------------------------------------------------------------------------------------------------------------------------------------------------------------------------------------------------------------------------------------------------------------------------------------------------------------------------------------------------------------------------------------------------------------------------------------------------------------------------------|--|
| <b>10. In your opinion, to what extent has the EU Forest Action Plan succeeded in:</b><br><i>Please note that the ranking provided in the question(s) below range from 1 (Not at all) to 9 (To a great extent).</i>                                                                                                                                                                                                                                                                                                                                                                                                                                                                                                                                                                     |  |
| <ul style="list-style-type: none"> <li>• supporting long-term competitiveness of the forest sector?</li> <li>• contributing to the positive environmental and health effects of forests required by global and international arrangements?</li> <li>• contributing to forest monitoring and forest protection?</li> <li>• contributing to quality of life by preserving and improving the social and cultural dimensions of forests?</li> <li>• improving coordination and coherence between different policy areas in forest sector within EU Commission?</li> <li>• improving coordination and coherence between different policy areas in forest sector between EU and Member States?</li> <li>• disseminating best practices and improving the visibility of the sector?</li> </ul> |  |
| <b>11. Has the implementation of the EU FAP led to any other effects than those described above?</b><br><i>Choose one of the following answers</i>                                                                                                                                                                                                                                                                                                                                                                                                                                                                                                                                                                                                                                      |  |
|                                                                                                                                                                                                                                                                                                                                                                                                                                                                                                                                                                                                                                                                                                                                                                                         |  |
| <i>If Yes, please specify and give examples of their effects.</i>                                                                                                                                                                                                                                                                                                                                                                                                                                                                                                                                                                                                                                                                                                                       |  |
|                                                                                                                                                                                                                                                                                                                                                                                                                                                                                                                                                                                                                                                                                                                                                                                         |  |

**12. Are there any other comments you would like to make about the implementation of the EU Forest Action Plan Objectives 1 to 4?**

Objective 1:  
Objective 2:  
Objective 3:  
Objective 4:

**Improvement of coherence and cross-sectoral co-operation in implementing the EU Forestry Strategy?**

The EU Forestry Strategy emphasises the importance of the multifunctional role of forests and sustainable forest management (SFM) for the development of society, and identifies a series of key elements, which form the basis for its implementation. It states that forest policy lies in the competence of the Member States, but that the EU can contribute to the implementation of SFM through common policies, based on the principle of subsidiarity and the concept of shared responsibility. It also emphasises the implementation of international commitments, principles and recommendations through national or sub-national forest programmes or equivalent instruments, and active participation in all forest-related international processes, and stresses the need to improve coordination, communication and cooperation in all policy areas of relevance to the forest sector.

Please note that the ranking provided in the question(s) below range from 1 (Not at all) to 9 (To a great extent).

**13. To what extent have the activities of the EU FAP contributed to the following objectives of the EU Forestry Strategy?**

- implementation of sustainable forest management
- implementation of international commitments, principles and recommendations
- active participation in all forest-related international processes
- improved coordination, communication and cooperation in all policy areas of relevance to the forest sector

**14. Are there any other comments you would like to make about the coherence and cross-sectoral co-operation in implementing the EU Forestry Strategy?**
**Economic, environmental and socio-cultural objectives related to forestry**

This section is concerned with how much attention was given to which dimensions of sustainable forest management in the EU FAP. This includes, how the activities were formulated and implemented, resources dedicated to it, objectives/targets and impacts that are to be expected.

Please note that the ranking provided in the question(s) below range from 1 (Not at all) to 9 (To a great extent).

**15. In your opinion, how were the three dimensions of sustainable development emphasised in the implementation of the EU FAP in 2007-2011:**

*Please distribute 100 points between the three options*

- Economic aspect of sustainable development
- Environmental aspect of sustainable development
- Socio-cultural aspect of sustainable development

*Do you think the emphases should have been different, please explain:*

**16. To what extent did the EU FAP Key Actions address relevant forest-related issues in Europe**
**Objective 1: Improving long-term competitiveness**

- KA1. Examine the effects of globalisation on the economic viability and competitiveness of EU forestry
- KA2. Encourage research and technological development to enhance the competitiveness of the forest sector
- KA3. Exchange and assess experiences on the valuation and marketing of non-wood forest goods and services
- KA4. Promote the use of forest biomass for energy generation
- KA5. Foster the cooperation between forest owners and enhance education and training in forestry

|                                                                                                                                                                                                   |
|---------------------------------------------------------------------------------------------------------------------------------------------------------------------------------------------------|
| <b>Objective 2: Improving and protecting the environment</b>                                                                                                                                      |
| KA6. Facilitate EU compliance with the obligations on climate change mitigation of the UNFCCC and its Kyoto Protocol and encourage adaptation to the effects of climate change                    |
| KA7. Contribute towards achieving the revised Community biodiversity objectives for 2010 and beyond                                                                                               |
| KA8. Work towards a European Forest Monitoring System                                                                                                                                             |
| KA9. Enhance the protection of EU forests                                                                                                                                                         |
| <b>Objective 3: Contributing to quality of life</b>                                                                                                                                               |
| KA10. Encourage environmental education and information                                                                                                                                           |
| KA11. Maintain and enhance the protective functions of forests                                                                                                                                    |
| KA12. Explore the potential of urban and peri-urban forests                                                                                                                                       |
| <b>Objective 4: Fostering coordination and cooperation</b>                                                                                                                                        |
| KA13. Strengthen the role of the Standing Forestry Committee                                                                                                                                      |
| KA14. Strengthen coordination between policy areas in forest-related matters                                                                                                                      |
| KA15. Apply the open method of coordination (OMC) to national forest programmes                                                                                                                   |
| KA16. Strengthen the EU profile in international forest-related processes                                                                                                                         |
| KA17. Encourage the use of wood and other forest products from sustainably managed forests                                                                                                        |
| KA18. Improve information exchange and communication                                                                                                                                              |
| <b>17. Do you think that the EU FAP has contributed to the sustainable development of the forest sector in Europe?</b><br><i>Choose one of the following answers</i>                              |
|                                                                                                                                                                                                   |
| <i>Please motivate your answer</i>                                                                                                                                                                |
|                                                                                                                                                                                                   |
| <b>18. Are there any other comments you would like to make about the EU Forest Action Plan contribution to balance economic, environmental and socio-cultural objectives related to forestry?</b> |
|                                                                                                                                                                                                   |

#### Added value in implementing the EU Forestry Strategy

This section concern the relevance of the EU Forest Action Plan (FAP) in covering and supporting priorities given in the forestry strategy, particularly those that are not dealt with through other policies. The EU FAP is an instrument for implementing the EU Forestry Strategy. Its added value can thus be defined through the operationalisation of the objectives of the strategy, coordination of different policy processes or in filling policy gaps. Added value can be understood as the extent to which the implementation of the EU FAP adds benefits to what would not have resulted without the EU FAP in implementing the EU Forestry Strategy.

|                                                                                                                                              |
|----------------------------------------------------------------------------------------------------------------------------------------------|
| <b>19. What is the main added value achieved until now by the EU FAP in terms of...</b>                                                      |
| <i>Implementing the EU Forestry Strategy and improving the visibility of the forest sector?</i>                                              |
|                                                                                                                                              |
| <i>Facilitating coherence and coordination of activities between different Community actions?</i>                                            |
|                                                                                                                                              |
| <i>Facilitating coordination of activities between the Commission and Member States?</i>                                                     |
|                                                                                                                                              |
| <i>Any other issues?</i>                                                                                                                     |
|                                                                                                                                              |
| <b>20. Are there any other comments you would like to make about the added value of the EU FAP in implementing the EU Forestry Strategy?</b> |
|                                                                                                                                              |

#### Relevance of current objectives, key actions and activities of the EU Forest Action Plan

This section reefer to the content of the EU Forest Action Plan (FAP) activities, for example, were the foreseen goals and measures still relevant when looking at the basic aims of the Forestry Strategy as well as the current policy framework and

the future challenges and needs faced by forests and the forest sector? It also refers to the nature and structure of the instruments chosen and the organisational set-up of the EU FAP and its appropriateness to tackle those needs.

Relevance is understood as the extent to which the EU FAP activities are consistent with current and/or future needs of stakeholders.

|                                                                                                                                                                                                                                                                                                                                                                                                                                                                                                                                                                     |
|---------------------------------------------------------------------------------------------------------------------------------------------------------------------------------------------------------------------------------------------------------------------------------------------------------------------------------------------------------------------------------------------------------------------------------------------------------------------------------------------------------------------------------------------------------------------|
| <b>21. In your opinion, to what extent have forestry related policy priorities changed during the implementation of the EU FAP 2007-2011?</b>                                                                                                                                                                                                                                                                                                                                                                                                                       |
| <i>In the EU as a whole?</i>                                                                                                                                                                                                                                                                                                                                                                                                                                                                                                                                        |
| <i>Please describe:</i>                                                                                                                                                                                                                                                                                                                                                                                                                                                                                                                                             |
| <i>For your organisation?</i>                                                                                                                                                                                                                                                                                                                                                                                                                                                                                                                                       |
| <i>Please describe:</i>                                                                                                                                                                                                                                                                                                                                                                                                                                                                                                                                             |
| <b>22. To what extent did implementation of the EU FAP in 2007-2011 address these changes in policy priorities, including new and emerging forest-related issues?</b>                                                                                                                                                                                                                                                                                                                                                                                               |
| <i>In the EU as a whole?</i>                                                                                                                                                                                                                                                                                                                                                                                                                                                                                                                                        |
| <i>If Yes, please list them all:</i>                                                                                                                                                                                                                                                                                                                                                                                                                                                                                                                                |
| <i>For your organisation?</i>                                                                                                                                                                                                                                                                                                                                                                                                                                                                                                                                       |
| <i>If Yes, please list them all:</i>                                                                                                                                                                                                                                                                                                                                                                                                                                                                                                                                |
| <b>23. To what extent has implementation of the EU FAP been compatible with the objectives of your organisation?</b>                                                                                                                                                                                                                                                                                                                                                                                                                                                |
|                                                                                                                                                                                                                                                                                                                                                                                                                                                                                                                                                                     |
| <b>24. Was your organisation able to influence the implementation of the EU FAP?</b>                                                                                                                                                                                                                                                                                                                                                                                                                                                                                |
|                                                                                                                                                                                                                                                                                                                                                                                                                                                                                                                                                                     |
| <b>25. In the EU Forest Action Plan and its work programme 2007-2011, the Lead Actors in implementing the Action Plan are the Commission and the Member States. The Standing Forestry Committee is the coordinating body between the Commission and the Member States, and collaboration with stakeholders on implementation of the Action Plan at Community level is channelled mainly through the Advisory Group on Forestry and Cork. Did this organisational set-up support the implementation of the EU FAP or should it have been done in some other way?</b> |
| <i>If appropriate, please describe:</i>                                                                                                                                                                                                                                                                                                                                                                                                                                                                                                                             |
| <i>Examples of good practices created during 2007-2011</i>                                                                                                                                                                                                                                                                                                                                                                                                                                                                                                          |
| <i>Examples of shortcomings in implementation</i>                                                                                                                                                                                                                                                                                                                                                                                                                                                                                                                   |
| <i>If appropriate, give examples of alternative ways of achieving cooperation and collaboration</i>                                                                                                                                                                                                                                                                                                                                                                                                                                                                 |
| <b>26. In your opinion, what are the main emerging <u>future</u> policy issues, societal needs and challenges facing the forest sector in Europe?</b>                                                                                                                                                                                                                                                                                                                                                                                                               |
|                                                                                                                                                                                                                                                                                                                                                                                                                                                                                                                                                                     |
| <b>27. Are there any other comments you would like to make about the relevance of the EU Forest Action Plan?</b>                                                                                                                                                                                                                                                                                                                                                                                                                                                    |
|                                                                                                                                                                                                                                                                                                                                                                                                                                                                                                                                                                     |
